# Supplementary material
Source: PubMed Central journal article supplement (PMC1783102)

Follower Growth Cones (n=22)

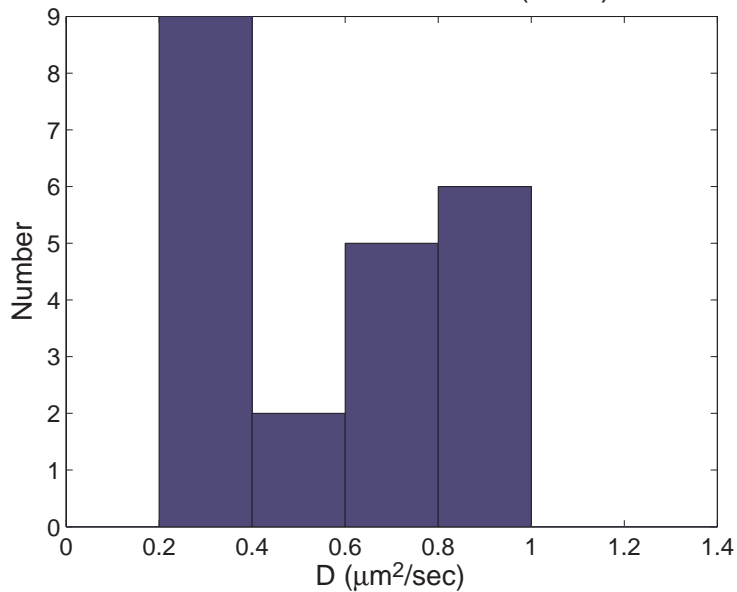

Leader Growth Cones (n=20)

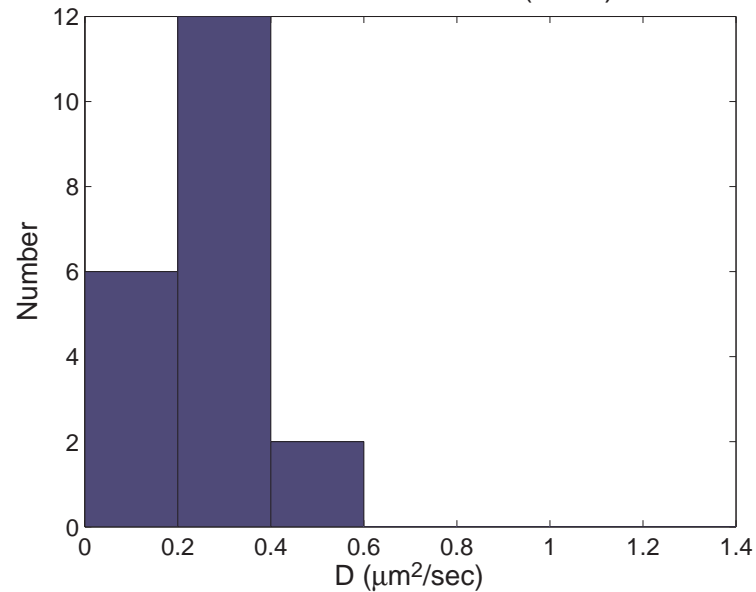

Off-Tract Followers (n=9)

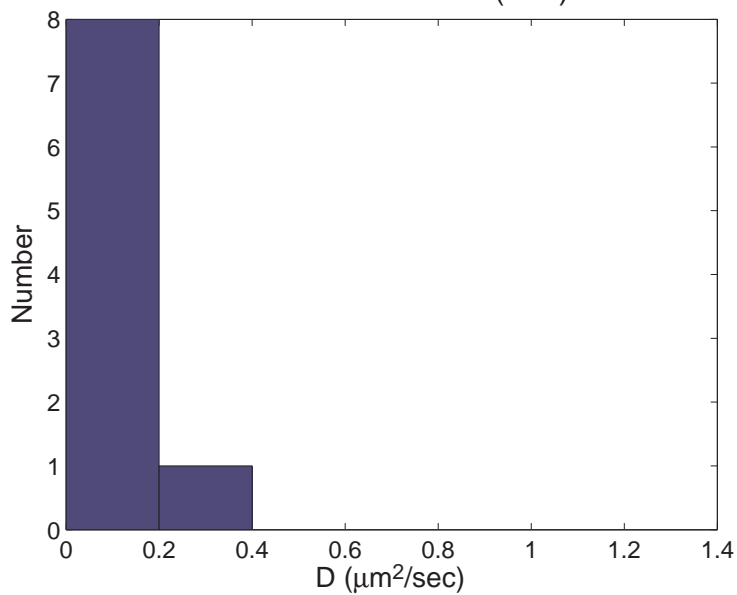

Cell Bodies (n=29)

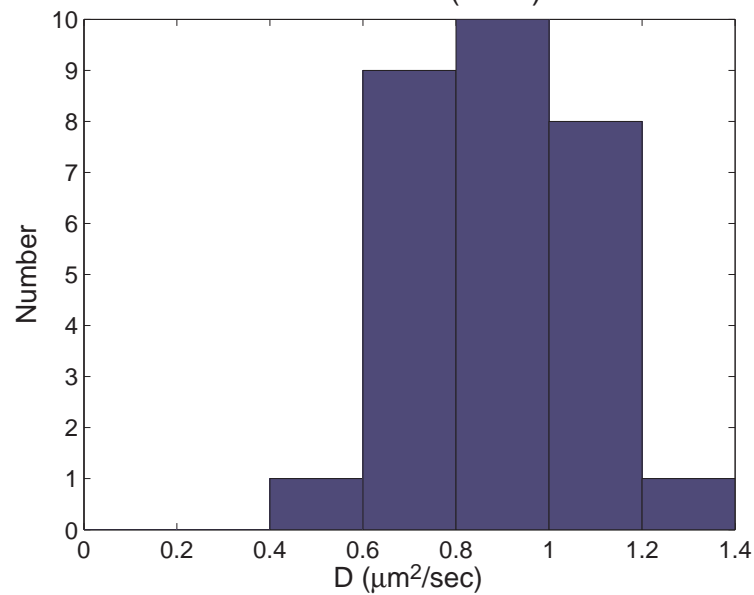

Axon Processes (n=23)

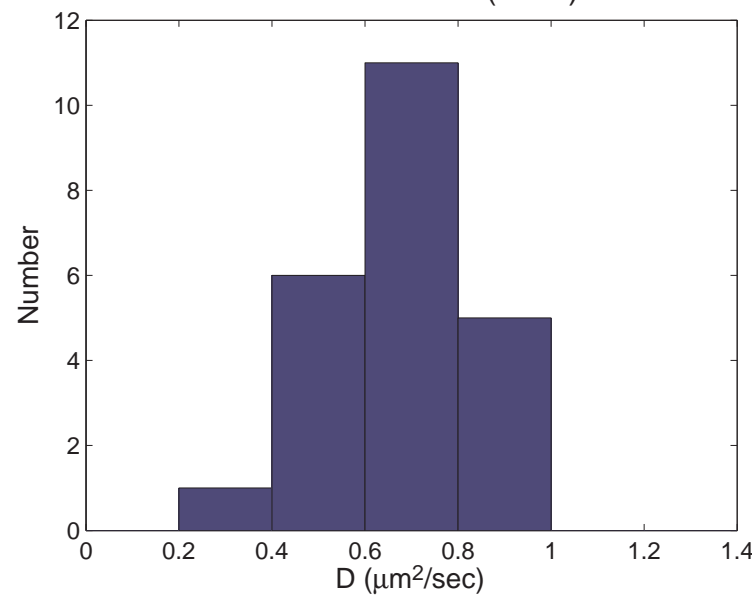

Supplement: pnas_0610142104_2.pdf [file pnas_0610142104_2.pdf]
