# Supplementary material
Source: PubMed Central journal article supplement (PMC1783102)

Followers with Cytochalasin (n=23)

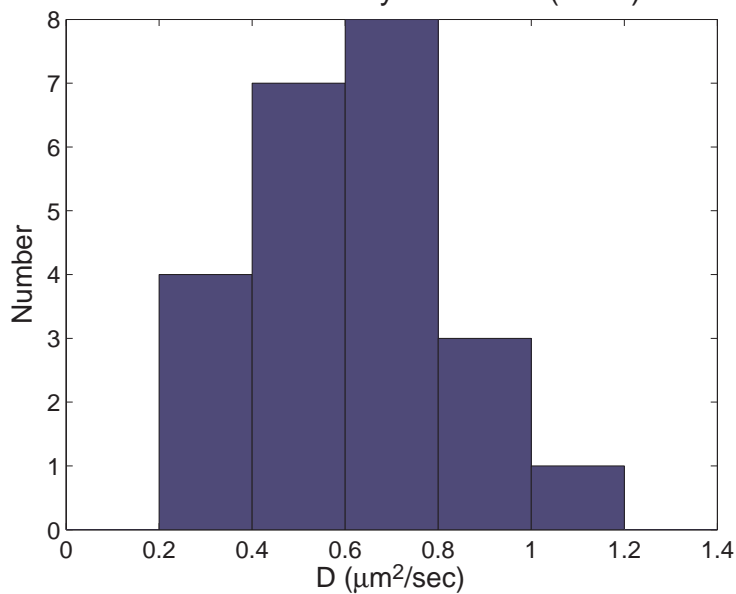

Leaders with Cytochalasin (n=27)

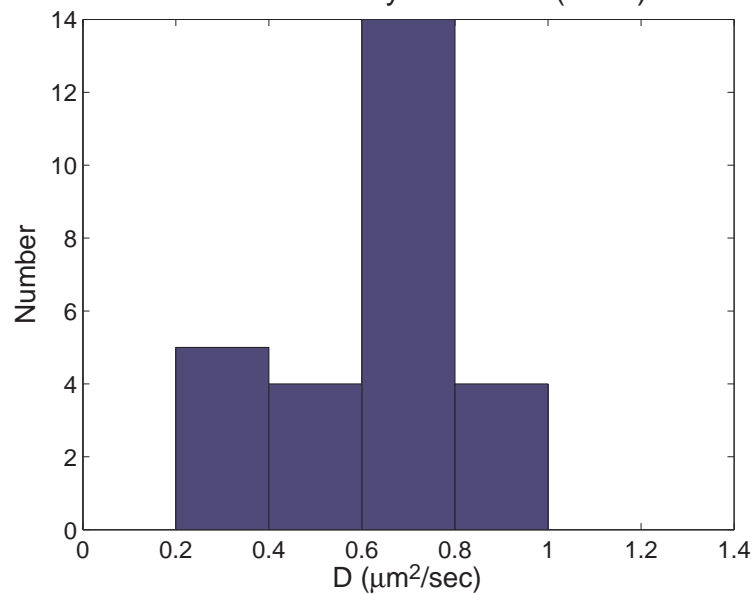

Off-Tract with Cytochalasin (n=16)

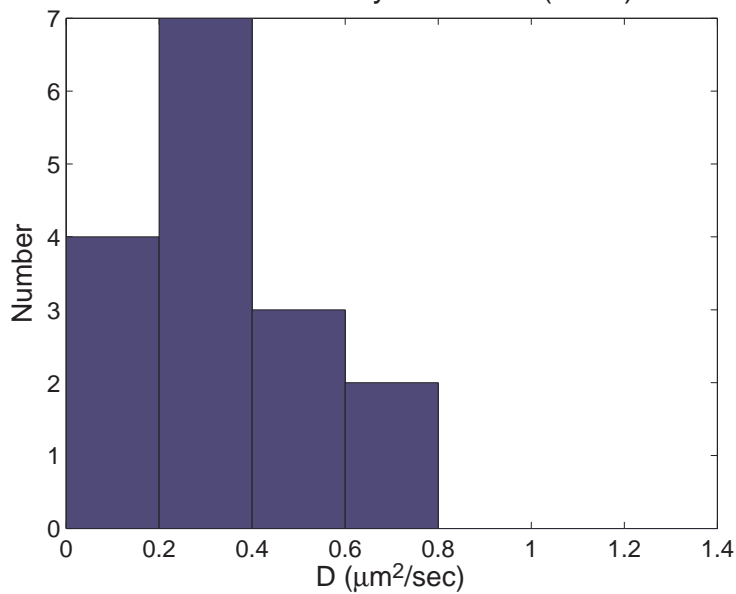

Cell Bodies with Cytochalasin (n=8)

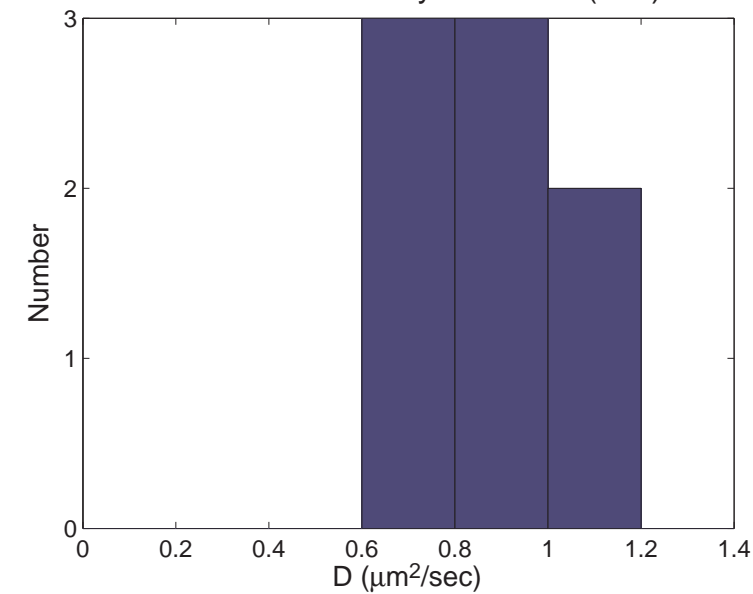

Axon Processes with Cytochalasin (n=19)

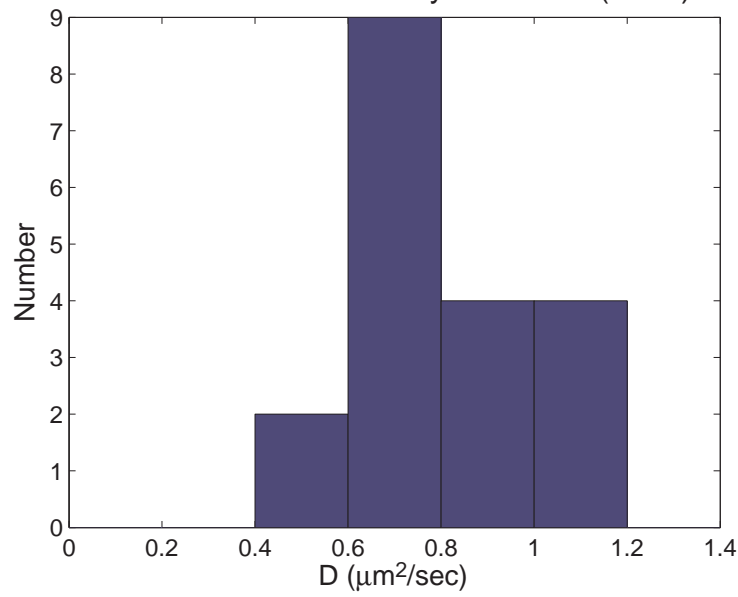

Supplement: pnas_0610142104_3.pdf [file pnas_0610142104_3.pdf]
