# Supplementary material
Source: PubMed Central journal article supplement (PMC1783102)

Followers with Nocodazole (n=34)

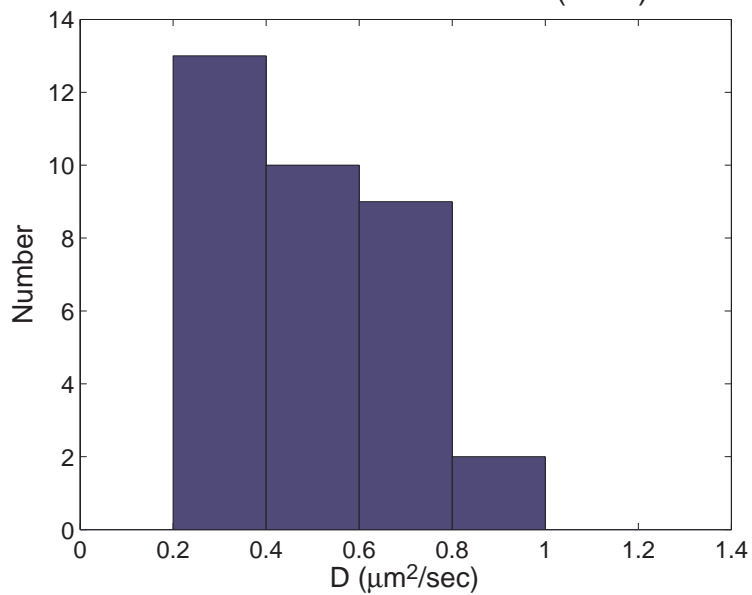

Leaders with Nocodazole (n=17)

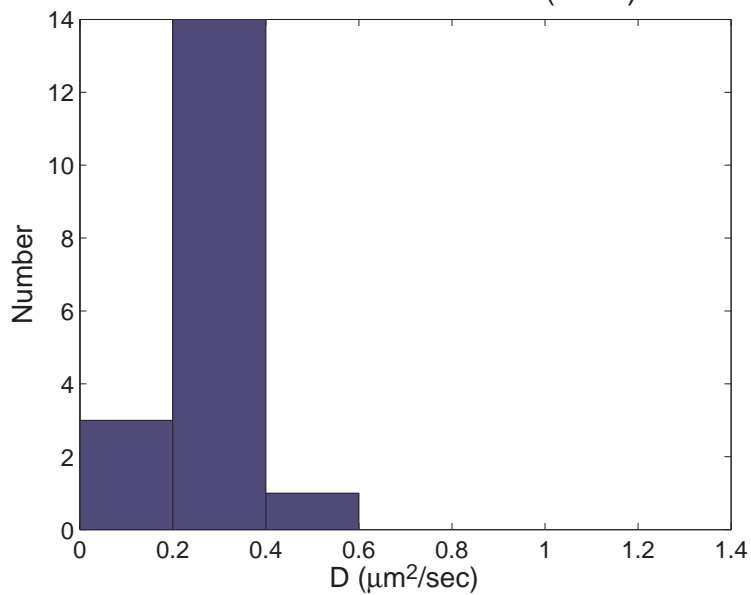

Off-Tract with Nocodazole (n=17)

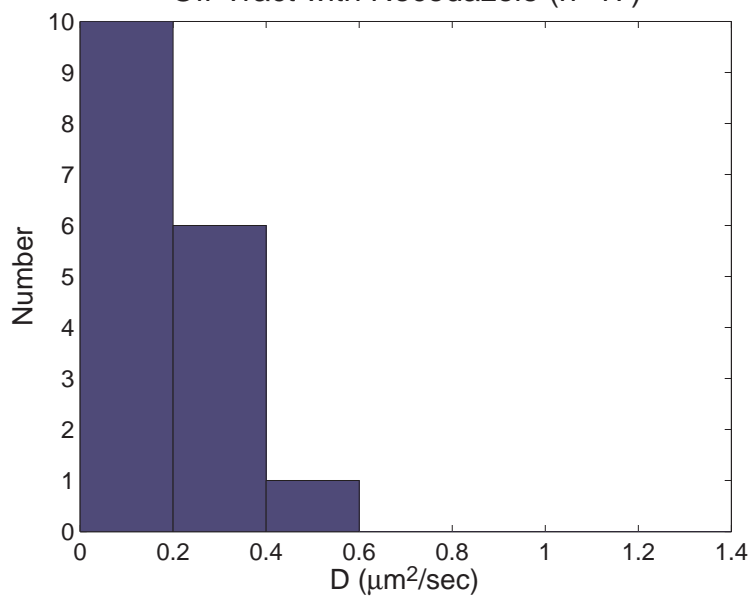

Cell Bodies with Nocodazole (n=9)

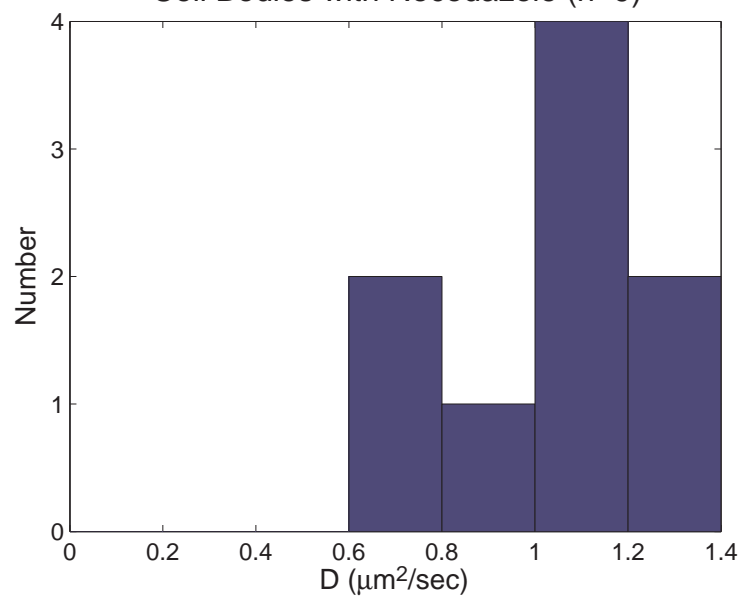

Axon Processes with Nocodazole (n=21)

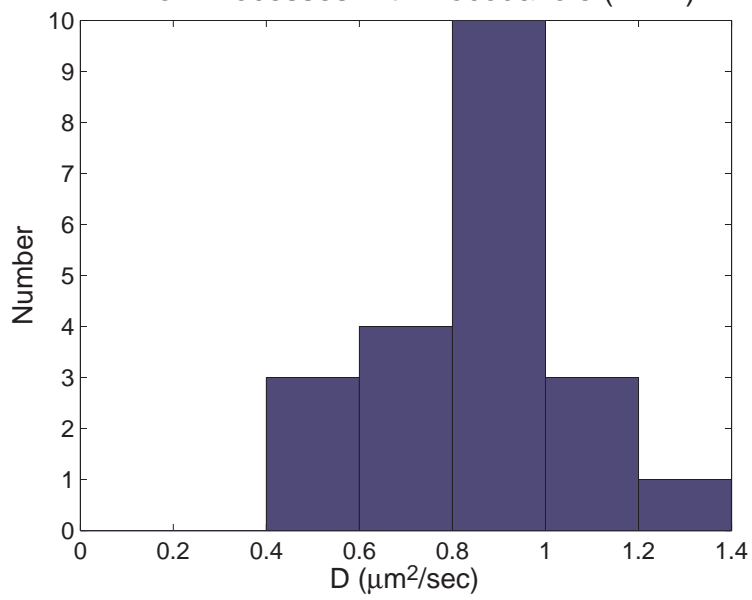

Supplement: pnas_0610142104_4.pdf [file pnas_0610142104_4.pdf]
