# Supplementary material
Source: PubMed Central journal article supplement (PMC1783102)

cell body

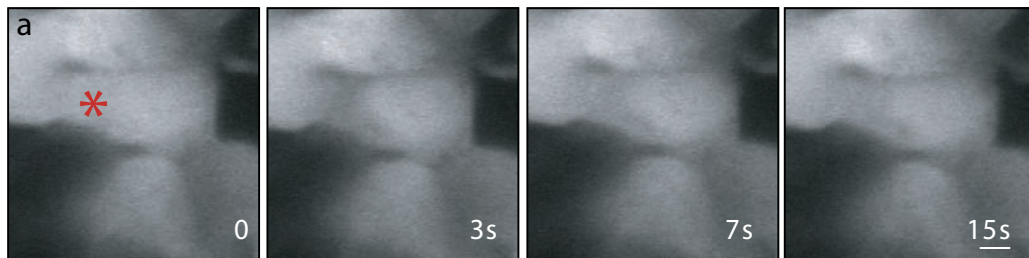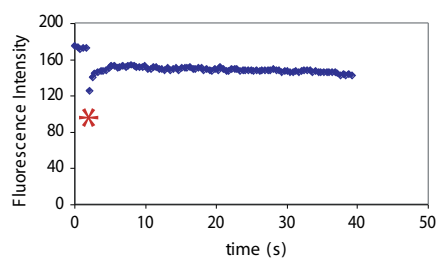

axon process

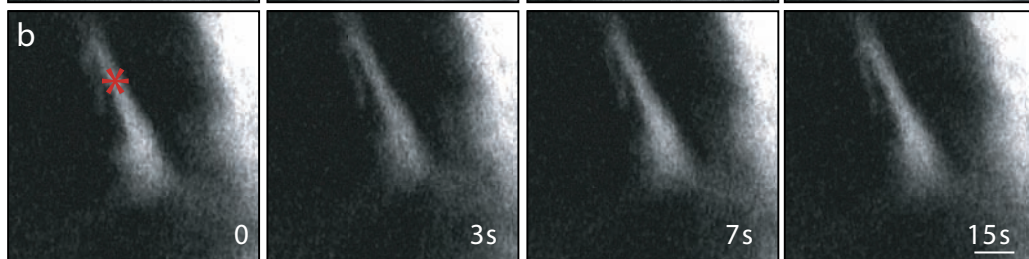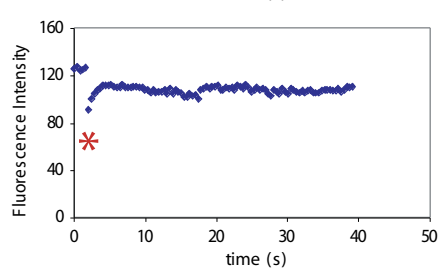

g. cone leader

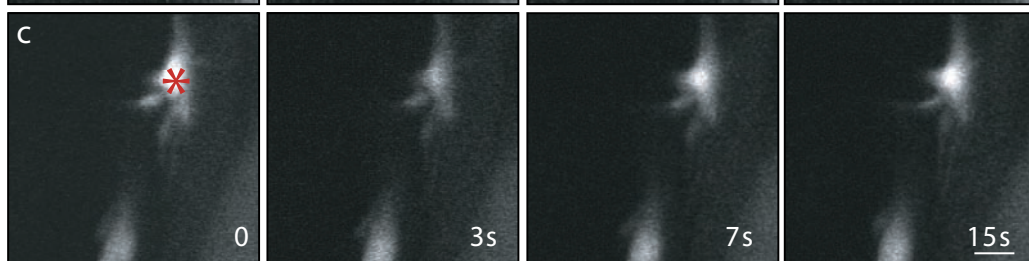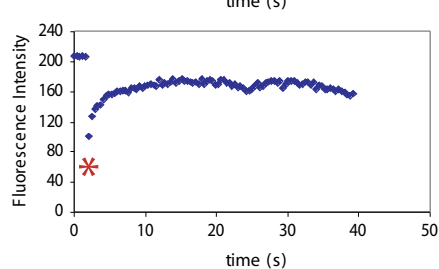

g. cone follower

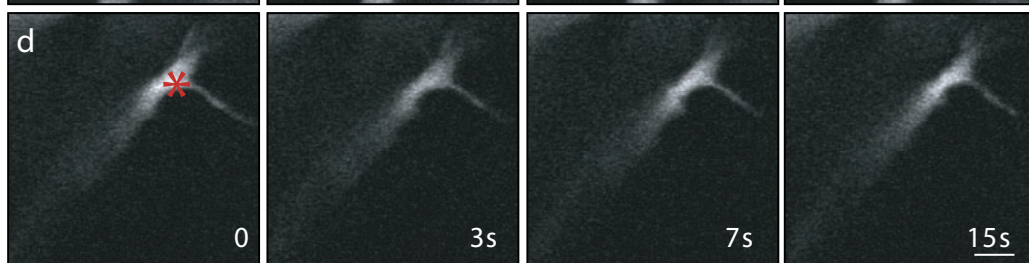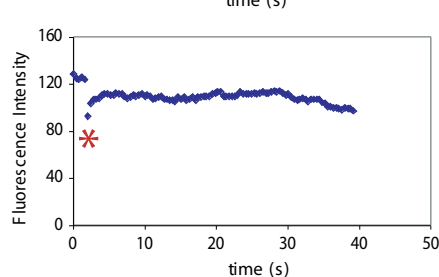

Supplement: pnas_0610142104_1.pdf [file pnas_0610142104_1.pdf]
